# Supplementary material
Source: PubMed Central journal article supplement (PMC2980993)
Supplement: supp_gfq234_gfq234_suppl.pdf [file supp_gfq234_gfq234_suppl.pdf]

## **Supplementary Information and Files**

### **Supplementary Video 1**

360<sup>0</sup> rotation of three-dimensional video of the logarithm of LF/HF along the x, y, z axis

### **Supplementary Video 2**

360<sup>0</sup> rotation of three-dimensional video of the logarithm of the HF component along the x, y, z axis
